# Supplementary material for: Association Between Stress Hyperglycemia Ratio and In-hospital Outcomes in Elderly Patients With Acute Myocardial Infarction
Source: PubMed Central journal article supplement (PMC8329087; doi:10.3389/fcvm.2021.698725), 2021-07-20
Supplement: Data_Sheet_1.pdf [file Data_Sheet_1.pdf]

**Supplementary Table 1.** Univariate and multivariate logistic regression analysis for in-hospital MACCEs

| Variable                             | Univariate analysis  |                 | Multivariate analysis <sup>a</sup> |                 |
|--------------------------------------|----------------------|-----------------|------------------------------------|-----------------|
|                                      | Odd ratios (95% CI)  | <i>P</i> -Value | Odd ratios (95% CI)                | <i>P</i> -Value |
| Age                                  | 1.037 (0.974–1.105)  | 0.253           |                                    |                 |
| Gender                               | 0.621 (0.364–1.059)  | 0.080           |                                    |                 |
| Hypertension                         | 1.280 (0.712–2.299)  | 0.409           |                                    |                 |
| Diabetes                             | 1.618 (0.928–2.819)  | 0.090           | 2.233 (1.158–4.307)                | 0.016           |
| Cardiac arrest before admission      | 3.605 (1.171–11.100) | 0.025           | 6.655 (1.755–25.243)               | 0.005           |
| Killip class $\geq 2$                | 2.632 (1.522–4.550)  | 0.001           |                                    |                 |
| Heart rate                           | 1.026 (1.011–1.042)  | 0.001           | 1.019 (1.002–1.036)                | 0.031           |
| Systolic blood pressure (per 10mmHg) | 0.829 (0.738–0.931)  | 0.002           | 0.834 (0.737–0.944)                | 0.004           |
| S2B within 12h                       | 0.537 (0.313–0.924)  | 0.025           |                                    |                 |
| Multi-vessel disease                 | 0.933 (0.520–1.673)  | 0.815           |                                    |                 |
| PCI                                  | 0.296 (0.124–0.708)  | 0.006           |                                    |                 |
| Complete revascularization           | 0.488 (0.286–0.834)  | 0.009           |                                    |                 |
| Hemoglobin                           | 0.988 (0.975–1.001)  | 0.069           |                                    |                 |
| Serum creatinine                     | 1.002 (1.000–1.005)  | 0.080           |                                    |                 |
| Lg NT-proBNP                         | 3.944 (2.253–6.904)  | <0.001          | 2.960 (1.589–5.512)                | 0.001           |
| LVEF                                 | 0.952 (0.930–0.974)  | <0.001          | 0.967 (0.941–0.993)                | 0.013           |
| Admission glucose (per mmol/L)       | 1.088 (1.023–1.157)  | 0.007           |                                    |                 |
| SHR <sup>b</sup>                     | 3.267 (1.716–6.223)  | <0.001          | 2.363 (1.127–4.954)                | 0.023           |

**Notes:** <sup>a</sup> Forward stepwise regression method was used in the multivariate logistic analysis, adjusting for age, gender, diabetes, cardiac arrest, Killip class, heart rate, systolic blood pressure, S2B, PCI, complete revascularization, LVEF, NT-proBNP, and admission glucose.

**Abbreviations:** S2B, symptom onset to balloon time; PCI, percutaneous coronary intervention; NT-proBNP, N-terminal pro-B type natriuretic peptide; LVEF, left ventricular ejection fraction; SHR, stress hyperglycemia ratio; CI, confidence incidence.

**Supplementary Table 2.** Univariate and multivariate logistic regression analysis for in-hospital death

| Variable                             | Univariate analysis  |                 | Multivariate analysis <sup>a</sup> |                 |
|--------------------------------------|----------------------|-----------------|------------------------------------|-----------------|
|                                      | Odd ratios (95% CI)  | <i>P</i> -Value | Odd ratios (95% CI)                | <i>P</i> -Value |
| Age                                  | 1.039 (0.964–1.119)  | 0.315           |                                    |                 |
| Gender                               | 1.645 (0.870–3.112)  | 0.126           |                                    |                 |
| Hypertension                         | 1.455 (0.705–3.002)  | 0.310           |                                    |                 |
| Diabetes                             | 1.290 (0.659–2.527)  | 0.458           |                                    |                 |
| Cardiac arrest before admission      | 3.200 (0.942–10.875) | 0.062           |                                    |                 |
| Killip class $\geq 2$                | 3.421 (1.720–6.804)  | <0.001          | 2.757 (1.337–5.687)                | 0.006           |
| Heart rate                           | 1.029 (1.011–1.047)  | 0.001           |                                    |                 |
| Systolic blood pressure (per 10mmHg) | 0.845 (0.736–0.969)  | 0.016           |                                    |                 |
| S2B within 12h                       | 0.468 (0.241–0.908)  | 0.025           |                                    |                 |
| Multi-vessel disease                 | 0.804 (0.406–1.592)  | 0.531           |                                    |                 |
| PCI                                  | 0.192 (0.078–0.477)  | <0.001          | 0.231 (0.088–0.606)                | 0.003           |
| Complete revascularization           | 0.485 (0.256–0.918)  | 0.026           |                                    |                 |
| Hemoglobin                           | 0.985 (0.970–1.000)  | 0.052           |                                    |                 |
| Serum creatinine                     | 1.002 (0.999–1.005)  | 0.169           |                                    |                 |
| Lg NT-proBNP                         | 3.542 (1.841–6.814)  | <0.001          |                                    |                 |
| LVEF                                 | 0.949 (0.923–0.976)  | <0.001          | 0.963 (0.935–0.991)                | 0.011           |
| Admission glucose (per mmol/L)       | 1.073 (1.001–1.150)  | 0.048           |                                    |                 |
| SHR <sup>b</sup>                     | 2.869 (1.374–5.989)  | 0.005           | 2.513 (1.153–5.476)                | 0.020           |

**Notes:** <sup>a</sup> Forward stepwise regression method was used in the multivariate logistic analysis, adjusting for age, gender, diabetes, Killip class, heart rate, systolic blood pressure, S2B, PCI, complete revascularization, LVEF, NT-proBNP, and admission glucose.

**Abbreviations:** S2B, symptom-onset-to-balloon time; PCI, percutaneous coronary intervention; NT-proBNP, N-terminal pro-B type natriuretic peptide; LVEF, left ventricular ejection fraction; SHR, stress hyperglycemia ratio; CI, confidence incidence.

**Supplementary Table 3.** Association between SHR and in-hospital outcomes in sensitivity analyses (Excluding patients without coronary revascularization, n = 318)

|            | Univariate analysis |                 | Multivariate analysis <sup>a</sup> |                    |
|------------|---------------------|-----------------|------------------------------------|--------------------|
|            | Odds ratio (95% CI) | <i>P</i> -value | Odds ratio (95% CI)                | <i>P</i> -value    |
| MACCEs     |                     |                 |                                    |                    |
| SHR <1.25  | 1 (reference)       |                 |                                    |                    |
| SHR ≥ 1.25 | 2.990 (1.670–5.354) | < 0.001         | 2.568 (1.384–4.767)                | 0.003 <sup>b</sup> |
| Death      |                     |                 |                                    |                    |
| SHR <1.25  | 1 (reference)       |                 |                                    |                    |
| SHR ≥ 1.25 | 2.957 (1.429–6.119) | 0.003           | 2.374 (1.107–5.090)                | 0.026 <sup>b</sup> |

**Notes:** <sup>a</sup>Multivariate logistic analysis with forward stepwise regression method. <sup>b</sup>Adjusted for age, gender, diabetes, cardiac arrest, Killip class, heart rate, systolic blood pressure, S2B, complete revascularization, LVEF, NT-proBNP, and admission glucose.
